# Supplementary material
Source: PubMed Central journal article supplement (PMC7418046)
Supplement: jamaneurol-e202734-s001.pdf [file jamaneurol-e202734-s001.pdf]

## Supplementary Online Content

Grill JD, Raman R, Ernstrom K, et al; for the A4 Study Team. Short-term psychological outcomes of disclosing amyloid imaging results to research participants who do not have cognitive impairment. *JAMA Neurol*. Published online August 10, 2020. doi:10.1001/jamaneurol.2020.2734

**eTable 1.** Multivariable assessments of visit 1 scores on psychological scales.

**eTable 2.** Raw psychological scale data.

This supplementary material has been provided by the authors to give readers additional information about their work.

| <b>eTable 1. Multivariable assessments of visit 1 scores on psychological scales.</b> |                 |                   |                  |                 |                 |                   |                  |                 |
|---------------------------------------------------------------------------------------|-----------------|-------------------|------------------|-----------------|-----------------|-------------------|------------------|-----------------|
|                                                                                       | <b>GDS</b>      |                   |                  |                 | <b>STAI</b>     |                   |                  |                 |
|                                                                                       | <b>Estimate</b> | <b>Std. error</b> | <b>Statistic</b> | <b>p-value*</b> | <b>Estimate</b> | <b>Std. error</b> | <b>Statistic</b> | <b>p-value*</b> |
| (intercept)                                                                           | 669.4           | 164.3             | 4.07             | <0.0001         | 765.7           | 181.9             | 4.21             | <0.0001         |
| Group (Elevated amyloid)                                                              | -2.4            | 23.0              | -0.10            | 0.92            | -8.8            | 25.4              | -0.35            | 0.73            |
| Age                                                                                   | 0.24            | 2.3               | 0.11             | 0.92            | -0.02           | 2.5               | -0.01            | 0.99            |
| CFI                                                                                   | 74.4            | 5.0               | 15.18            | <0.0001         | 46.4            | 5.6               | 8.33             | <0.0001         |
| Sex (Male)                                                                            | 25.9            | 21.5              | 1.20             | 0.23            | -102.9          | 23.8              | -4.32            | <0.0001         |
| Family history (Yes)                                                                  | -12.3           | 23.8              | -0.52            | 0.61            | 47.6            | 26.3              | 1.81             | 0.07            |

\*Based on a rank regression analysis with visit 1 GDS score as the dependent variable and amyloid group as the independent variable of interest, adjusting for age, screening CFI score, APOE and family history of dementia.

\*\* Models could not be run for CSSRS due to infrequent scores >0.

| <b>eTable 2. Post-disclosure safety results</b> |                          |                         |                             |                |
|-------------------------------------------------|--------------------------|-------------------------|-----------------------------|----------------|
| <b>Outcome</b>                                  |                          | <b>Elevated amyloid</b> | <b>Not elevated amyloid</b> | <b>p-value</b> |
| CSSRS                                           | N                        | 1155                    | 534                         |                |
|                                                 | Mean change (SD) [Range] | -0.01 (0.5) [-9, 6]     | 0.0 (0.4) [-5,6]            | 0.67           |
|                                                 | Increase >0, n (%)       | 8 (0.7)                 | 4 (0.8)                     | 0.99           |
| GDS                                             | N                        | 1165                    | 536                         |                |
|                                                 | Mean change (SD) [Range] | 0.04 (1.3) [-8, 8]      | 0.02 (1.3) [-7, 8]          | 0.87           |
|                                                 | Increase to >6, n (%)    | 10 (0.9)                | 5 (0.9)                     | 0.99           |
| STAI                                            | N                        | 1165                    | 535                         |                |
|                                                 | Mean change (SD) [Range] | -0.15 (3.0) [-15, 12]   | -0.02 (3.2) [-14, 11]       | 0.46           |
|                                                 | Increase to >17, n (%)   | 17 (1.5)                | 10 (1.9)                    | 0.54           |
| IES                                             | N                        | 1157                    | 512                         |                |
|                                                 | Median (IQR) [Range]     | 7.0 (1,16) [0, 54]      | 3.0 (0,9) [0,44]            | <0.001         |
|                                                 | 0, n (0%)                | 198 (17.1)              | 149 (29.1)                  | <0.001         |
|                                                 | 1-8, n (%)               | 438 (37.9)              | 228 (44.5)                  |                |
|                                                 | 9-25, n (%)              | 407 (35.3)              | 119 (23.2)                  |                |
| >25, n (%)                                      | 114 (9.8)                | 16 (3.1)                |                             |                |

Note: Two sample t-tests for continuous variables and Fisher tests for categorical variables were used to compare the two groups post-disclosure.
